# Supplementary material for: Safety and Tolerability of tDCS across Different Ages, Sexes, Diagnoses, and Amperages: A Randomized Double-Blind Controlled Study
Source: MDPI journal article supplement (doi:10.3390/jcm12134346), 2023-06-28
Supplement: s1 [file s1]

**Table S1.** F statistics of each group effect and associated partial  $\eta^2$ , as well as Bayes factor.

| Side effect              | Time | Age                |                         |       | Sex                |                         |       | Clinical Status    |                         |       |
|--------------------------|------|--------------------|-------------------------|-------|--------------------|-------------------------|-------|--------------------|-------------------------|-------|
|                          |      | F <sub>1, 58</sub> | $\eta_{\text{partial}}$ | Bayes | F <sub>1, 58</sub> | $\eta_{\text{partial}}$ | Bayes | F <sub>1, 58</sub> | $\eta_{\text{partial}}$ | Bayes |
| Sick/Unwell              | T1   | 1.193              | 0.020                   | 3.000 | 0.665              | 0.011                   | 3.803 | 0.790              | 0.013                   | 3.534 |
|                          | T2   | 0.310              | 0.005                   | 4.470 | 0.034              | 0.001                   | 5.065 | 1.143              | 0.019                   | 3.017 |
|                          | T3   | 1.634              | 0.027                   | 2.460 | 0.400              | 0.007                   | 4.288 | 0.823              | 0.014                   | 3.483 |
|                          | T4   | 2.071              | 0.034                   | 2.030 | 0.000              | 0.000                   | 5.144 | 0.083              | 0.001                   | 4.863 |
|                          | T5   | 0.341              | 0.006                   | 4.400 | 0.341              | 0.006                   | 4.404 | 0.057              | 0.001                   | 4.923 |
|                          | T6   | 0.026              | 0.000                   | 5.080 | 1.300              | 0.022                   | 2.858 | 0.000              | 0.000                   | 5.051 |
| Headache                 | T1   | 3.180              | 0.052                   | 1.245 | 1.482              | 0.025                   | 2.635 | 0.048              | 0.001                   | 4.943 |
|                          | T2   | 0.164              | 0.003                   | 4.773 | 0.164              | 0.003                   | 4.773 | 0.247              | 0.004                   | 4.516 |
|                          | T3   | 1.402              | 0.024                   | 2.730 | 2.814              | 0.046                   | 1.462 | 0.590              | 0.010                   | 3.867 |
|                          | T4   | 0.171              | 0.003                   | 4.760 | 0.171              | 0.003                   | 4.760 | 0.064              | 0.001                   | 4.907 |
|                          | T5   | 0.644              | 0.011                   | 3.839 | 0.644              | 0.011                   | 3.839 | 1.751              | 0.029                   | 2.301 |
|                          | T6   | 0.015              | 0.000                   | 5.110 | 0.375              | 0.006                   | 4.337 | 0.090              | 0.002                   | 4.850 |
| Difficulty Concentrating | T1   | 0.751              | 0.013                   | 3.659 | 0.452              | 0.008                   | 4.189 | <b>5.628</b>       | 0.088                   | 0.432 |
|                          | T2   | 0.829              | 0.014                   | 3.533 | 0.091              | 0.002                   | 4.936 | 3.365              | 0.055                   | 1.134 |
|                          | T3   | <b>4.840</b>       | 0.077                   | 0.609 | 0.037              | 0.001                   | 5.058 | 1.232              | 0.021                   | 2.900 |
|                          | T4   | 2.071              | 0.034                   | 2.027 | 2.071              | 0.034                   | 2.027 | 0.083              | 0.001                   | 4.863 |
|                          | T5   | 2.054              | 0.034                   | 2.043 | 2.054              | 0.034                   | 2.043 | 0.013              | 0.000                   | 5.021 |
|                          | T6   | 2.630              | 0.043                   | 1.585 | 0.281              | 0.005                   | 4.527 | 0.293              | 0.005                   | 4.423 |
| Tearful/Crying           | T1   | 1.121              | 0.019                   | 3.098 | 0.398              | 0.007                   | 4.291 | 1.075              | 0.018                   | 3.110 |
|                          | T2   | 0.000              | 0.000                   | 5.144 | 0.000              | 0.000                   | 5.144 | 0.730              | 0.012                   | 3.630 |
|                          | T3   | 1.032              | 0.017                   | 3.224 | 2.959              | 0.049                   | 1.372 | 0.473              | 0.008                   | 4.077 |
|                          | T4   | .                  | .                       | .     | .                  | .                       | .     | .                  | .                       | .     |
|                          | T5   | .                  | .                       | .     | .                  | .                       | .     | .                  | .                       | .     |
|                          | T6   | <b>5.046</b>       | 0.080                   | 0.558 | 1.331              | 0.022                   | 2.819 | 2.342              | 0.039                   | 1.772 |
| Nervous/Anxious          | T1   | 0.802              | 0.014                   | 3.575 | 0.483              | 0.008                   | 4.131 | 0.080              | 0.001                   | 4.871 |
|                          | T2   | 0.738              | 0.013                   | 3.680 | 0.134              | 0.002                   | 4.839 | 0.010              | 0.000                   | 5.029 |
|                          | T3   | 3.856              | 0.062                   | 0.929 | 3.856              | 0.062                   | 0.929 | 0.446              | 0.008                   | 4.126 |
|                          | T4   | 2.814              | 0.046                   | 1.462 | 0.497              | 0.008                   | 4.104 | 0.037              | 0.001                   | 4.968 |
|                          | T5   | 2.918              | 0.048                   | 1.396 | 2.918              | 0.048                   | 1.396 | 0.700              | 0.012                   | 3.680 |
|                          | T6   | 0.015              | 0.000                   | 5.109 | 0.379              | 0.006                   | 4.329 | 2.191              | 0.036                   | 1.895 |
| Vision                   | T1   | 0.077              | 0.001                   | 4.967 | 1.986              | 0.033                   | 2.105 | 0.322              | 0.006                   | 4.365 |
|                          | T2   | 1.000              | 0.017                   | 3.270 | 1.000              | 0.017                   | 3.270 | 1.513              | 0.025                   | 2.558 |
|                          | T3   | 2.071              | 0.034                   | 2.027 | 0.000              | 0.000                   | 5.144 | 3.164              | 0.052                   | 1.238 |
|                          | T4   | .                  | .                       | .     | .                  | .                       | .     | .                  | .                       | .     |
|                          | T5   | .                  | .                       | .     | .                  | .                       | .     | .                  | .                       | .     |
|                          | T6   | 1.000              | 0.017                   | 3.270 | 1.000              | 0.017                   | 3.270 | 1.513              | 0.025                   | 2.558 |
| Tiredness                | T1   | <b>11.308</b>      | 0.163                   | 0.044 | 3.619              | 0.059                   | 1.029 | 0.142              | 0.002                   | 4.735 |
|                          | T2   | 0.086              | 0.001                   | 4.947 | 3.649              | 0.059                   | 1.016 | 2.383              | 0.039                   | 1.741 |
|                          | T3   | 0.632              | 0.011                   | 3.860 | 0.632              | 0.011                   | 3.860 | <b>5.172</b>       | 0.082                   | 0.523 |
|                          | T4   | 0.286              | 0.005                   | 4.517 | 1.160              | 0.020                   | 3.043 | <b>4.617</b>       | 0.074                   | 0.662 |
|                          | T5   | 0.771              | 0.013                   | 3.626 | 0.191              | 0.003                   | 4.716 | 0.803              | 0.014                   | 3.513 |
|                          | T6   | 0.022              | 0.000                   | 5.092 | 0.568              | 0.010                   | 3.974 | 0.015              | 0.000                   | 5.017 |
| Pain                     | T1   | 1.000              | 0.017                   | 3.270 | 1.000              | 0.017                   | 3.270 | 1.513              | 0.025                   | 2.558 |
|                          | T2   | 1.000              | 0.017                   | 3.270 | 1.000              | 0.017                   | 3.270 | 1.513              | 0.025                   | 2.558 |
|                          | T3   | 3.575              | 0.058                   | 1.049 | 1.058              | 0.018                   | 3.185 | 2.911              | 0.048                   | 1.382 |
|                          | T4   | 1.000              | 0.017                   | 3.270 | 1.000              | 0.017                   | 3.270 | 0.663              | 0.011                   | 3.742 |
|                          | T5   | 0.148              | 0.003                   | 4.809 | 0.413              | 0.007                   | 4.264 | 1.353              | 0.023                   | 2.747 |
|                          | T6   | .                  | .                       | .     | .                  | .                       | .     | .                  | .                       | .     |

|                                     |    |              |       |       |              |       |       |              |       |       |
|-------------------------------------|----|--------------|-------|-------|--------------|-------|-------|--------------|-------|-------|
| Tingling                            | T1 | 0.000        | 0.000 | 5.144 | 3.222        | 0.053 | 1.223 | 2.109        | 0.035 | 1.964 |
|                                     | T2 | 1.000        | 0.017 | 3.270 | 1.000        | 0.017 | 3.270 | 0.663        | 0.011 | 3.742 |
|                                     | T3 | 3.016        | 0.049 | 1.338 | 0.017        | 0.000 | 5.105 | 0.011        | 0.000 | 5.025 |
|                                     | T4 | 0.910        | 0.015 | 3.406 | 3.055        | 0.050 | 1.316 | 3.041        | 0.050 | 1.305 |
|                                     | T5 | 3.636        | 0.059 | 1.022 | 0.297        | 0.005 | 4.493 | 0.127        | 0.002 | 4.769 |
|                                     | T6 | 2.071        | 0.034 | 2.027 | 0.000        | 0.000 | 5.144 | 1.365        | 0.023 | 2.732 |
| Itching                             | T1 | 0.079        | 0.001 | 4.961 | 0.723        | 0.012 | 3.705 | 0.480        | 0.008 | 4.064 |
|                                     | T2 | 0.867        | 0.015 | 3.472 | 0.867        | 0.015 | 3.472 | 0.254        | 0.004 | 4.501 |
|                                     | T3 | 1.661        | 0.028 | 2.433 | 0.033        | 0.001 | 5.068 | 2.921        | 0.048 | 1.376 |
|                                     | T4 | 0.436        | 0.007 | 4.219 | 1.785        | 0.030 | 2.302 | 0.290        | 0.005 | 4.428 |
|                                     | T5 | 3.251        | 0.053 | 1.207 | <b>4.067</b> | 0.066 | 0.848 | 2.252        | 0.037 | 1.844 |
|                                     | T6 | 1.919        | 0.032 | 2.169 | 0.838        | 0.014 | 3.518 | 0.424        | 0.007 | 4.167 |
| Hot                                 | T1 | 1.000        | 0.017 | 3.270 | 1.000        | 0.017 | 3.270 | 0.663        | 0.011 | 3.742 |
|                                     | T2 | .            | .     | .     | .            | .     | .     | .            | .     | .     |
|                                     | T3 | 0.118        | 0.002 | 4.874 | 1.083        | 0.018 | 3.150 | 0.242        | 0.004 | 4.525 |
|                                     | T4 | 1.000        | 0.017 | 3.270 | 1.000        | 0.017 | 3.270 | 1.513        | 0.025 | 2.558 |
|                                     | T5 | <b>4.568</b> | 0.073 | 0.684 | 0.226        | 0.004 | 4.640 | 0.421        | 0.007 | 4.174 |
|                                     | T6 | 1.000        | 0.017 | 3.270 | 1.000        | 0.017 | 3.270 | 1.513        | 0.025 | 2.558 |
| Nausea                              | T1 | 0.198        | 0.003 | 4.701 | 1.092        | 0.018 | 3.137 | 0.297        | 0.005 | 4.415 |
|                                     | T2 | 1.601        | 0.027 | 2.498 | 0.174        | 0.003 | 4.753 | 0.000        | 0.000 | 5.051 |
|                                     | T3 | 1.389        | 0.023 | 2.746 | 0.000        | 0.000 | 5.144 | 0.127        | 0.002 | 4.767 |
|                                     | T4 | 1.000        | 0.017 | 3.270 | 1.000        | 0.017 | 3.270 | 0.663        | 0.011 | 3.742 |
|                                     | T5 | 0.341        | 0.006 | 4.404 | 0.341        | 0.006 | 4.404 | 2.109        | 0.035 | 1.964 |
|                                     | T6 | 0.564        | 0.010 | 3.981 | 0.564        | 0.010 | 3.981 | 0.375        | 0.006 | 4.262 |
| Trouble<br>Sleeping/<br>Wakefulness | T1 | 0.089        | 0.002 | 4.940 | 3.786        | 0.061 | 0.957 | 0.026        | 0.000 | 4.991 |
|                                     | T2 | 2.397        | 0.040 | 1.756 | 1.124        | 0.019 | 3.092 | 2.582        | 0.043 | 1.596 |
|                                     | T3 | 3.168        | 0.052 | 1.252 | 2.539        | 0.042 | 1.649 | 3.034        | 0.050 | 1.309 |
|                                     | T4 | <b>4.262</b> | 0.068 | 0.780 | 2.943        | 0.048 | 1.381 | 0.272        | 0.005 | 4.464 |
|                                     | T5 | <b>7.340</b> | 0.112 | 0.214 | 1.676        | 0.028 | 2.417 | <b>5.530</b> | 0.087 | 0.450 |
|                                     | T6 | 0.141        | 0.002 | 4.823 | 0.016        | 0.000 | 5.108 | 0.859        | 0.015 | 3.426 |

Significant effects are in bold; . indicates that all the ratings were zero.

Table S1 presents the 234 (13X6X3) comparisons between 3 groups (children vs adults, males vs females, ADHD vs healthy controls) of 13 side effects for each of the six time points. A total of 11 significant differences were present across all 234 comparisons (.047%), which is less than expected even by chance (i.e., alpha .05). These differences also did not appear to cluster on any specific side effect or time point but rather appeared quite sporadically. No group difference survived a multiple comparison correction.

**Table S2:** Effect of Low vs. High amperage across the whole sample, and interactions with age, sex and clinical status

|               |      | Amperage          |                         |       | Age X Amp         |                         | Sex X Amp         |                         | Clinical Status X Amp |                         |
|---------------|------|-------------------|-------------------------|-------|-------------------|-------------------------|-------------------|-------------------------|-----------------------|-------------------------|
|               |      | F <sub>1,57</sub> | $\eta_{\text{partial}}$ | Bayes | F <sub>1,55</sub> | $\eta_{\text{partial}}$ | F <sub>1,55</sub> | $\eta_{\text{partial}}$ | F <sub>1,55</sub>     | $\eta_{\text{partial}}$ |
| Side effect   | Time |                   |                         |       |                   |                         |                   |                         |                       |                         |
| Sick Unwell   | T2   | 0.057             | 0.001                   | 4.322 | 0.056             | 0.001                   | 3.695             | 0.063                   | 3.191                 | 0.055                   |
|               | T3   | 1.167             | 0.020                   | 3.012 | 0.970             | 0.017                   | 0.146             | 0.003                   | 0.586                 | 0.011                   |
|               | T4   | 1.733             | 0.030                   | 2.626 | 0.594             | 0.011                   | 0.017             | 0.000                   | 0.072                 | 0.001                   |
| Headache      | T2   | 2.280             | 0.038                   | 1.439 | 1.660             | 0.029                   | 0.238             | 0.004                   | 0.271                 | 0.005                   |
|               | T3   | 0.339             | 0.006                   | 4.325 | 0.151             | 0.003                   | 0.418             | 0.008                   | 0.419                 | 0.008                   |
|               | T4   | 0.558             | 0.010                   | 3.485 | 2.917             | 0.050                   | 0.004             | 0.000                   | 0.100                 | 0.002                   |
| Concentrating | T2   | 0.056             | 0.001                   | 5.026 | 0.030             | 0.001                   | 0.304             | 0.006                   | 0.002                 | 0.000                   |
|               | T3   | 0.901             | 0.016                   | 3.380 | 1.610             | 0.028                   | 0.002             | 0.000                   | 0.001                 | 0.000                   |
|               | T4   | 0.062             | 0.001                   | 4.949 | 0.003             | 0.000                   | 0.203             | 0.004                   | 1.370                 | 0.024                   |
| Tearful       | T2   | 0.027             | 0.000                   | 3.461 | 1.154             | 0.021                   | 0.003             | 0.000                   | 0.076                 | 0.001                   |
| Crying        | T3   | 3.575             | 0.059                   | 0.784 | 1.383             | 0.025                   | 3.156             | 0.054                   | 0.733                 | 0.013                   |
|               | T4   | .                 | .                       | .     | .                 | .                       | .                 | .                       | .                     | .                       |
| Nervous       | T2   | 0.371             | 0.006                   | 1.287 | 3.937             | 0.067                   | 0.071             | 0.001                   | 0.408                 | 0.007                   |
| Anxious       | T3   | 0.236             | 0.004                   | 2.903 | 0.107             | 0.002                   | 0.396             | 0.007                   | 0.032                 | 0.001                   |
|               | T4   | 0.049             | 0.001                   | 4.795 | 0.472             | 0.009                   | 1.383             | 0.025                   | 0.374                 | 0.007                   |
| Vision        | T2   | 0.057             | 0.001                   | 3.682 | 1.351             | 0.024                   | 0.045             | 0.001                   | 1.287                 | 0.023                   |
|               | T3   | 0.040             | 0.001                   | 4.949 | 0.079             | 0.001                   | 1.510             | 0.027                   | 0.074                 | 0.001                   |
|               | T4   | .                 | .                       | .     | .                 | .                       | .                 | .                       | .                     | .                       |
| Tiredness     | T2   | 1.701             | 0.029                   | 3.093 | 1.736             | 0.031                   | 2.543             | 0.044                   | 0.203                 | 0.004                   |
|               | T3   | 0.008             | 0.000                   | 5.070 | 1.042             | 0.019                   | 0.198             | 0.004                   | 0.152                 | 0.003                   |
|               | T4   | 1.131             | 0.019                   | 2.964 | 1.965             | 0.034                   | 0.037             | 0.001                   | 1.890                 | 0.033                   |
| Pain          | T2   | .                 | .                       | 3.682 | 0.000             | 0.000                   | .                 | .                       | 0.000                 | 0.000                   |
|               | T3   | 0.315             | 0.006                   | 4.496 | 0.085             | 0.002                   | 0.004             | 0.000                   | 0.295                 | 0.005                   |
|               | T4   | 1.369             | 0.023                   | 2.691 | 1.269             | 0.023                   | 0.916             | 0.016                   | 0.899                 | 0.016                   |
| Tingling      | T2   | 0.806             | 0.014                   | 3.682 | 2.960             | 0.051                   | 0.692             | 0.012                   | 0.612                 | 0.011                   |
|               | T3   | 0.809             | 0.014                   | 3.366 | 0.502             | 0.009                   | 0.839             | 0.015                   | 1.683                 | 0.030                   |
|               | T4   | 0.724             | 0.013                   | 3.421 | 0.109             | 0.002                   | 0.008             | 0.000                   | 0.450                 | 0.008                   |
| Itching       | T2   | <b>5.470</b>      | 0.088                   | 2.619 | 0.148             | 0.003                   | 1.780             | 0.031                   | 1.414                 | 0.025                   |
|               | T3   | 2.228             | 0.038                   | 2.712 | 0.792             | 0.014                   | 0.000             | 0.000                   | 0.773                 | 0.014                   |
|               | T4   | 2.034             | 0.034                   | 1.147 | 0.234             | 0.004                   | 1.243             | 0.022                   | 0.076                 | 0.001                   |
| Hot           | T2   | .                 | .                       | .     | .                 | .                       | .                 | .                       | .                     | .                       |
|               | T3   | 0.011             | 0.000                   | 5.072 | 0.142             | 0.003                   | 0.654             | 0.012                   | <b>4.689</b>          | 0.079                   |
|               | T4   | 1.470             | 0.025                   | 2.691 | 1.483             | 0.026                   | 0.889             | 0.016                   | 2.104                 | 0.037                   |
| Nausea        | T2   | 0.395             | 0.007                   | 4.548 | 0.569             | 0.010                   | 0.930             | 0.017                   | 0.571                 | 0.010                   |
|               | T3   | 0.104             | 0.002                   | 4.882 | 0.571             | 0.010                   | 0.994             | 0.018                   | 1.370                 | 0.024                   |
|               | T4   | 1.093             | 0.019                   | 3.682 | 0.002             | 0.000                   | 0.466             | 0.008                   | 1.341                 | 0.024                   |
|               | T2   | 0.689             | 0.012                   | 4.085 | 0.263             | 0.005                   | 1.636             | 0.029                   | 0.010                 | 0.000                   |
|               | T3   | 1.625             | 0.028                   | 2.438 | 1.408             | 0.025                   | 0.148             | 0.003                   | 0.135                 | 0.002                   |

|                          |    |       |       |       |       |       |       |       |       |       |
|--------------------------|----|-------|-------|-------|-------|-------|-------|-------|-------|-------|
| Trouble                  | T4 | 1.984 | 0.034 | 2.078 | 0.157 | 0.003 | 0.006 | 0.000 | 0.159 | 0.003 |
| Sleeping/<br>Wakefulness |    |       |       |       |       |       |       |       |       |       |

Table S2: Significant effects are in bold; . indicates that all the ratings were zero.

**Figure S1.** 3D bar graph of side effects at each time point for females and males.

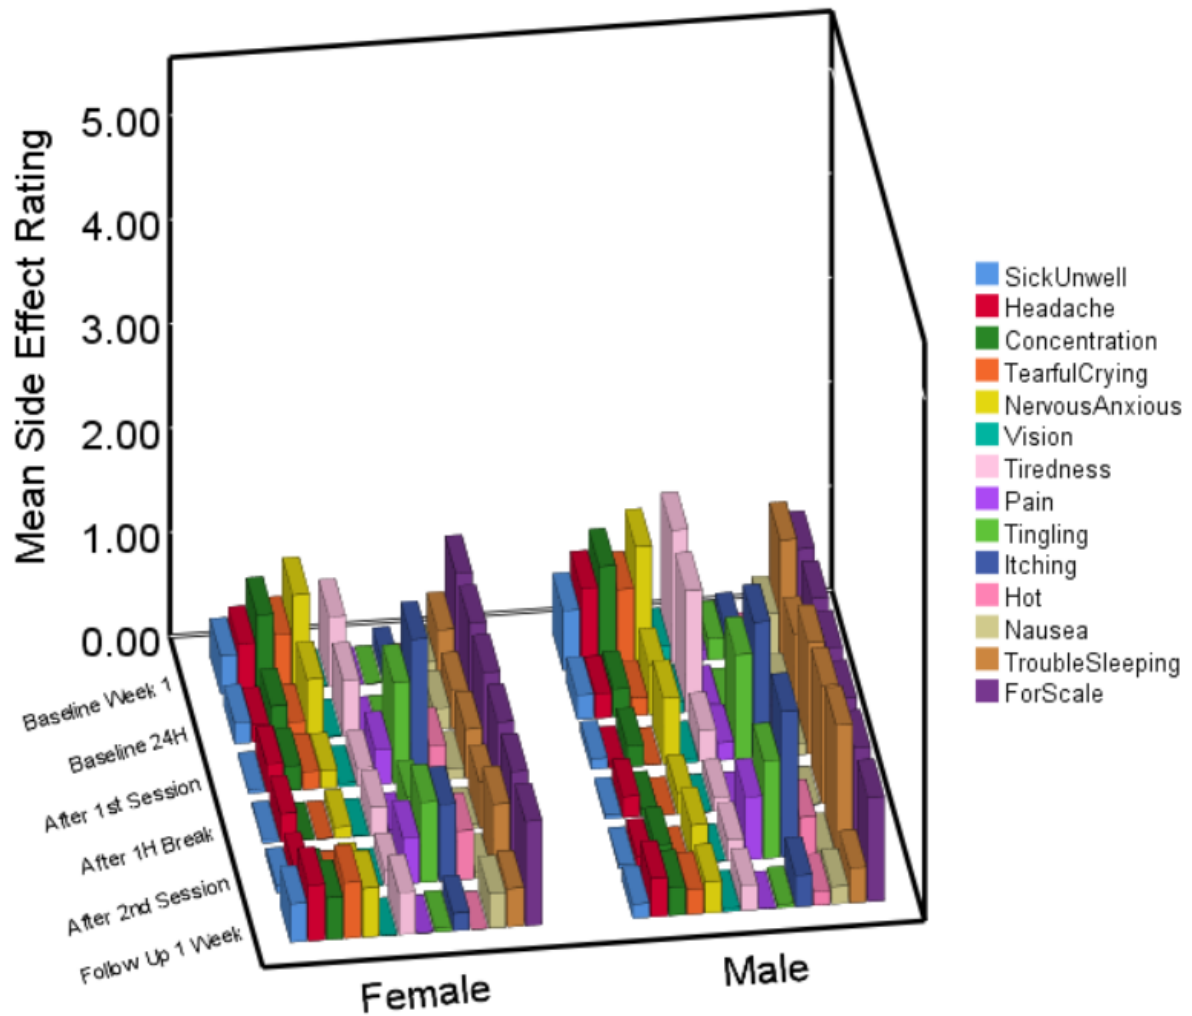

Figure S1: Average ratings for the female and male sample at each time point for the 13 different side effects. The 14<sup>th</sup> variable is a scale at a rating of 1, for comparison.

Figure S1 clearly illustrates that mean side effect ratings of both males and females rarely exceeded a maximum rating of 1 'mild'.

**Figure S2.** 3D bar graph of side effects at each time point for clinical and healthy subjects.

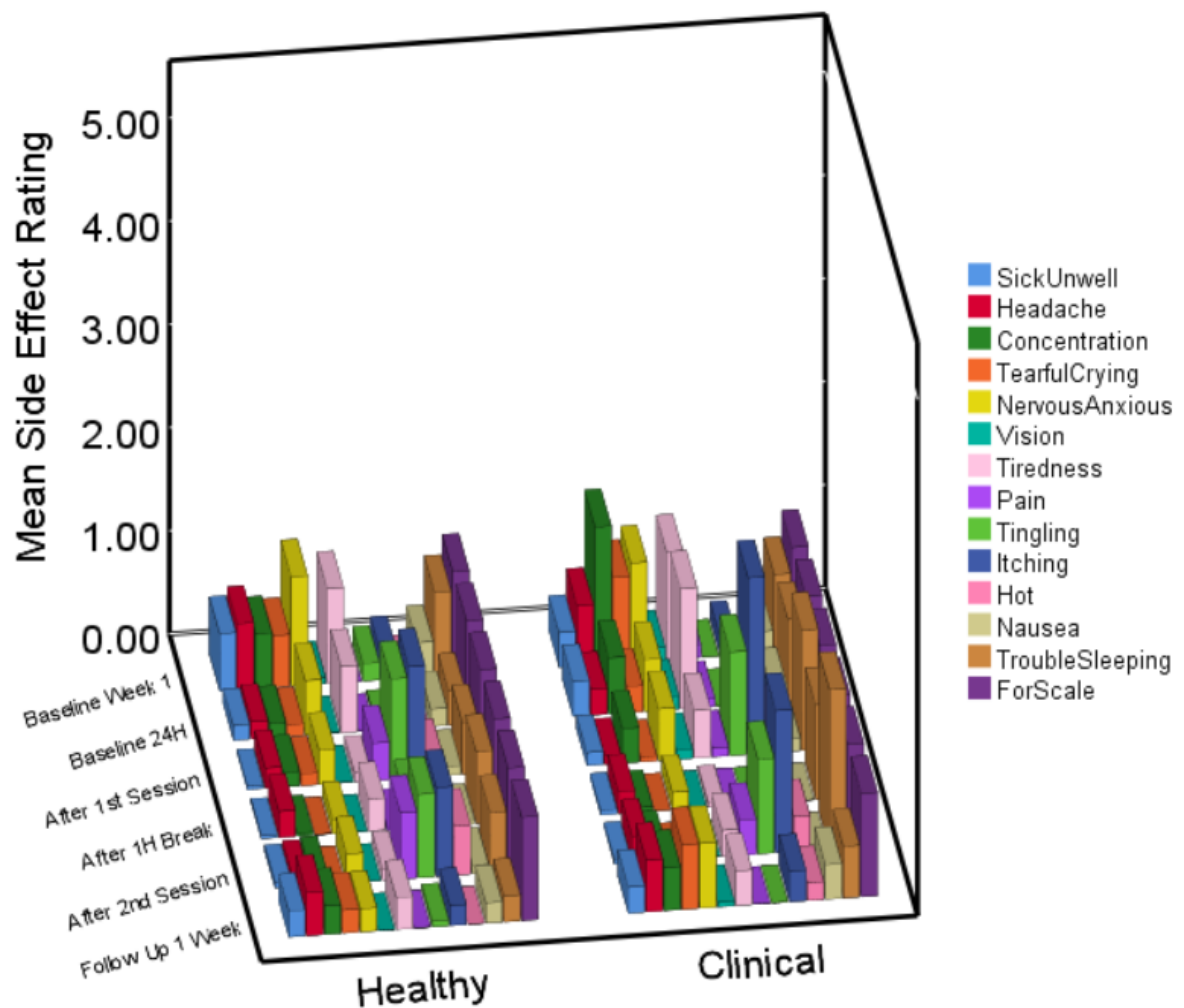

Figure S2: Average ratings for the control and clinical sample at each time point for the 13 different side effects. The 14<sup>th</sup> variable is a scale at a rating of 1, for comparison.

Figure S2 clearly illustrates that mean side effect ratings of both males and females rarely exceeded a maximum rating of 1 ‘mild’.
